# Supplementary material for: Detection of O25B-ST131 clone and blaCTX-M-15 gene in Escherichia coli isolated from patients with COVID-19
Source: PeerJ. 2025 Mar 6;13:e19011. doi: 10.7717/peerj.19011 (PMC11890292; doi:10.7717/peerj.19011)
Supplement: Supplemental Information 2 [file peerj-13-19011-s002.xlsx]

## Sheet: staph 
No:	Code	Bacteria	SAMPLE	DNA	Purity	AGE	SEX	MRS	Mec A	MLSb	BLACT	GN	CFX	CTX	AM	P	OX	DAPTO	STX	TEI
4	1047833	S.epi	ASPIRATE FLUID			59	M	N			Y	S	S	S	R	R	S	S	S	I
8	1200246	S.aureus	CV LINE			39	M	Y			Y	R	R	R	R	R	R	S	S	S
12	1016390	S.aureus	NASAL			64	M	N			Y	S	S	S	R	R	S	S	S	S
15	1144044	S.aureus	BLOOD			66	M	N			Y	S	S	S	R	R	S	S	S	S
16	1199353	S.epi	CATH.TIP			36	M	Y			Y	R	R	R	R	R	R		R	S
20	1199744	S.aureus	BLOOD			51	M	Y			Y	S	R	R	R	R	R	S	S	S
28	1054888	S.aureus	BLOOD			75	M	N			Y	S	S	S	R	R	S	S		S
29	1199353	S.epi	CV LINE			62	F	Y			Y	I	R	R	R	R	R	S	S	S
33	1200886	S.aureus	ETA			49	F	Y			Y	S	R	R	R	R	R	S	R	S
34	1200823	S.aureus	BLOOD			67	M	N			Y	S	S	S	R	R	S	S	R	S
35	1200218	S.haemo	CV LINE			52	M	Y			Y	R	R	R	R	R	R	S	S	S
36	1175784	S.epi	BLOOD			75	F	Y			Y	R	R	R	R	R	R	S	S	S
46	1200288	S.haemo	BLOOD			54	M	Y			Y	R	R	R	R	R	R	S	R	S
49	1201382	S.Aureus	NASAL			54	M	N			Y	S	S	S	R	R	S	S	S	S
51	12013820	S.Aureus	NASAL			54	M	N			Y	S	S	S	R	R	S	S	S	S
53	1110303	S.epi	BLOOD			77	M	Y			N	R	R	R	R	R	R	S	S	S
57	1018077	S.epi	BLOOD			71	M	Y			Y	S	R	R	R	R	R	S	R	S
59	1004804	S.hominis	BLOOD			81	M	Y			Y	R	R	R	R	R	R	S	R	S
64	1201230	S.hominis	FLUID			61	F	N			Y	S	S	S	R	R	S	S	S	S
65	1201180	S.epi	BLOOD			44	M	Y			Y	S	R	R	R	R	R	S	R
74	1204524	S.epi	blood			29	M	Y			Y	S	R	R	R	R	R	S	R	S
81	1200652	S.Aureus	ETA			11	M	Y			Y	S	R	R	R	R	R	S	S	S
94	1197266	S.Aureus	BLOOD			52	F	N			Y	S	S	S	R	R	S	S	S	S
95	1197649	S.SCIURI	BAL			42	F	Y			Y	S	R	R	R	R	R	S	R	S
97	1196299	S.Aureus	NASAL			51	M	N			Y	S	S	S	R	R	S	S	S	S
99	1076726	S.Aureus	ETA			50	F	N			Y	S	S	S	R	R	S	S	S	S
105	1196879	S.Lentus	BLOOD			30	F	Y			Y	R	R	R	R	R	R	S	R	S
106	1096619	S.epi	BLOOD			42	M	Y			Y	S	R	R	R	R	R	S	S	R
109	1176142	S.HAemo	ETA			72	M	Y			Y	S	R	R	R	R	R	S	S	S
110	1161811	S.Aureus	BLOOD			13	M	N			Y	S	S	S	R	R	S	S	S	S
111	1173863	S.Aureus	ETA			55	F	N			Y	S	S	S	R	R	S	S	S	S
113	1197266	S.Aureus	CV-LINE			52	M	N			Y	S	S	S	R	R	S	S	S	S
116	1190390	S.Aureus	BLOOD			53	F	Y			Y	S	R	R	R	R	R	S	S	S
117	1198046	S.HAemo	CATH.TIP			58	F	Y			Y	R	R	R	R	R	R	S	R	S
118	1073649	S.epi	CV-LINE			73	F	Y			Y	S	R	R	R	R	R	S	S	S
119	1194086	S.SCIURI	CATH.TIP			24	F	Y			N	S	R	R	R	R	R	S	S	S
124	1176643	S.HAemo	CV-LINE			17	M	Y			Y	R	R	R	R	R	R	S	R	I
21	1205009	S.aureus	blood			31	M	y			y	S	R	R	R	R	R	S	S	S
8	1205150	S. hemolyticus	FLUID			25	F	Y		N	Y	R	R	R	R	R	R	S	R	S

## Sheet: KLEBSIELLA 
No	code	bacteria	device	sample	Age	sex	AMC	CTX	CRO	CAZ	ATM	FEP	LEV	CIP	STX	CL	IMP	MEM	PIZ	AK	CN
59	1069017	K	V	ETA	87	M	I	R	R	R	R	R	R	R	R	S	S	S	S	S	S
65	1072462	ENT	V	ETA	51	M	R	R	R	R	S	R	R	R	S	S	S	S	S	S	S
85	1072312	E	V	ETA	60	M	S	R	R	R	R	R	S	S	R	S	S	S	S	S	S
95	1076179	K	CPAP	sputum	78	M	R	R	R	R	R	R	I	I	S	S	S	S	S	S	S
105	1076391	E	CPAP	sputum	72	F	I	R	R	R	R	R	R	R	R	S	S	S	I	S	S
122	1076932	K	CPAP	sputum	59	M	R	R	R	R	R	R	R	R	S	S	S	S	S	S	S
134	1074272	K	CPAP	Urine	51	M	S	R	R	R	R	R	S	S	R	S	S	S	S	S	S
142	1070486	K	CPAP	urine	69	M	R	R	R	R	R	R	S	S	R	S	S	S	S	S	S
146	1076586	E	CPAP	sputum	92	M	R	R	R	R	R	R	R	R	S	S	S	S	S	S	R
167	1017421	K	V	ETA	70	F	I	R	R	R	R	S	R	R	R	S	S	S	S	S	R
179	1076586	CT	V	ETA	91	M	R	R	R	R	R	R	R	R	S	S	S	S	S	S	R
186	1076932	K	V	blood	59	M	R	R	R	R	R	R	R	R	R	S	S	S	S	S	S
189	1080666	K	CPAP	sputum	69	F	R	R	R	R	R	R	S	S	S	S	S	S	S	S	S
219	1085268	K	CPAP	urine	81	M	R	R	R	R	R	R	R	R	R	S	R	R	R	S	S
243	1078179	K	CPAP	sputum	53	M	R	R	R	R	R	R	R	R	R	S	R	R	R	R	R
246	1074272	K	CPAP	sputum	67	M	S	R	R	R	R	R	S	S	R	S	S	S	S	S	S
252	1083837	E	CPAP	sputum	64	F	R	S	R	R	S	R	R	R	R	S	S	S	S	S	R
253	1082555	K	CPAP	sputum	89	M	S	S	S	S	S	S	S	S	S	S	S	S	S	S	S
258		K	V	blood		F	S	S	S	S	S	S	S	S	S	S	S	S	S	S	S
286	1089744	K	CPAP	urine	49	F	S	S	S	S	S	S	S	S	S	S	S	S	S	S	S
298	1028295	E	CPAP	sputum	53	M	S	R	R	R	R	R	S	S	S	S	S	S	R	S	S
306	1090822	K	CPAP	sputum	79	M	R	R	R	R	R	R	S	S	S	S	R	R	S	S	S
329	1092894	E	V	ETA	47	M	S	R	R	R	R	R	R	R	R	S	R	R	R	R	R
341	1087150	K	V	ETA	66	M	S	R	R	R	R	R	S	S	S	S	S	S	S	S	S
342	1093530	K	CPAP	sputum	77	F	R	S	S	R	S	S	S	R	S	S	S	S	S	S	S
380	1096930	k	CPAP	sputum	59	M	R	S	S	S	S	S	S	R	R	S	S	S	S	S	R
396	1100581	k	V	ETA	50	M	R	R	R	R	R	R	R	R	R	S	S	S	R	R	R
422	1101635	k	CPAP	sputum	64	F	R	R	R	R	R	R	S	S	S	S	S	S	S	S	S
423	1098675	k	V	ETA	61	M	R	R	R	R	R	R	S	S	R	S	R	S	R	R	S
428	1102739	k	CPAP	sputum	66	M	S	R	R	R	R	R	S	S	R	S	S	S	S	S	S
430	1102111	E	CPAP	sputum	68	F	I	R	R	R	R	R	S	R	R	S	S	S	S	S	R
461	1104863	k	CPAP	Sputum	61	F	R	R	R	R	R	R	R	R	R	S	S	S	S	S	S
491	1096930	k	CPAP	sputum	59	M	R	R	R	R	R	R	R	R	R	S	R	R	R	R	R
492	1109935	k	CPAP	sputum	44	M	I	R	R	R	R	R	R	I	R	S	S	S	S	S	S
525	1106070	E	CPAP	sputum	58	M	I	R	R	R	R	R	I	R	R	S	S	S	S	S	S
526	1085094	E	CPAP	sputum	65	M	R	R	R	R	R	R	R	R	R	S	R	R	R	R	R
553	1115618	E	CPAP	sputum	6	M	S	S	S	S	S	S	S	S	S	S	S	S	S	S	S
554	1107241	K	CPAP	sputum	39	M	S	S	S	S	S	S	I	S	S	S	S	S	S	S	S
567	1117322	k	V	ETA	37	F	R	R	R	R	R	R	I	R	R	S	R	R	R	R	R
587	1085094	K	CPAP	sputum	65	M	R	S	S	S	S	S	S	S	S	S	S	S	S	S	R
597	1119515	E	CPAP	sputum		F	R	S	S	S	S	S	S	S	S	S	S	S	S	S	S
610	1114776	k	CPAP	sputum	65	M	S	S	S	S	S	S	S	S	S	S	S	S	S	S	S
620	1138440	k	V	BAL	44	M	R	S	I	S	S	I	S	R	S	S	S	S	S	S	S
622	1138244	k	CPAP	Sputum	55	M	S	S	S	S	S	S	S	S	S	S	S	S	S	S	S
625		k	V	ETA	58	M	R	R	R	R	R	R	R	R	R	S	R	R	R	R	R
263	1141570	K	CPAP	sputum	25	M	S	S	S	S	S	S	R	R	S	S	R	R	S	S	S
720	1049523	k	V	ETA	58	F	R	R	R	R	R	R	R	R	R	S	S	S	R	R	S
A12	1141901	S. macerance	V	BAL	37	F	R	s	S	S	s	S	S	S	S	R	S	S	S	S	S
A9		S. fonticola	V	BAL	77	M	R	R	R	R	R	R	S	S	R	R	R	R	R	R	R
K4	1148105	k	CPAP	Sputum	60	M	S	S	S	S	S	S	S	S	S	S	S	S	S	S	S
K10	1040206	K	V	BAL	75	M	R	R	R	R	R	R	R	R	S	S	R	R	R	R	R
K15	1151832	K	CPAP	Sputum	62	F	S	S	S	S	S	I	S	S	S	S	S	S	S	I	S
710		K	CPAP	SPUTUM	65	sex	S	S	S	S	S	S	S	S	S	S	S	S	S	S	S
A2	1141659	K.aerogenes	V	BAL	65	M	R	R	R	R	R	R	R	R	R	R	R	R	R	R	R
K2	1146799	K	CPAP	SPUTUM	81	F	R	S	S	S	S	S	S	S	S	S	S	S	S	S	S
A22	1144364	E	CPAP	SPUTUM	55	M	R	R	R	R	R	R	R	R	R	S	R	R	R	S	S
A13	1099637	S. maserence	CPAP	SPUTUM	66	M	R	S	S	S	S	S	S	S	S	R	I	S	S	S	S

## Sheet: none fermenter 
199	1072312	A	ETA			60	M	R	R	S	I	R	S	S	R	R	R	S	R	R	R	7.15	6.5
226	1072312	A	ETA			58	M	R	R	S	I	R	S	S	R	R	R	S	R	R	R	7.15	7.37
499	1066413	Aeromonas	Sputum			66	M	R	R		S		R	R	S	R	S	S	R	R	R		6.251
517	1110427	A	sputum			67	M	S	R	S	S	R	R	I	R	R	R	R	R	R	R	79.1	11.296
555	1115618	pluirbacter gerovari	Sputum			60	M	S	S	S	S	S	S	S	S	S	S	S	S	S	S	75.82	12.2.
574	1107241	A	Sputum			39	M	R	R	S	R	R	R	R	R	S	R	R	R	R	R	2.11	7.176
583	1117322	A	Sputum			47	M	S	S	S	S	S	S	S	S	R	S	S	S	S	S
592	1119272	A	Sputum			78	M	S	S	S	R	S	S	S	S	S	S	S	S	S	S	97.4	8.13
704	1117621	A	BAL			36	F	I	I	R	R	R	R	R	R	R	R	R	R	R	R	506	13
P4	1076179	A	Sputum	230	1.79	78	M	S	S	S	S	S	S	S	S	S	S	S	S	I	S	28.15	7

## Sheet: PSEUDO
2	1042254	urine	M	51	R	R	R	I	S	R		R	R	R	R	R	I	R	R
113	1051679	urine	M	66	R	S	S	R	S	R	S	S	R	R	R	R	S	R	R
171	1047246	urine /no ABO	F	71	S	R	S	S	S	A		R	S	S	S	R	S	S	S
172	1078494	urine				S	S	S	R	S		S	I	S	R	I	I	S	R
359	1089845	urine			S	S	S	S	S	S		S	S	S	S	S	S	S	S
490	1095410	urine				S	S	S	R			R	S	S	S	S	S	S	S
599	1111667	urine	M	48	R	S	S	S	S	S		R	S	S	S	R	S	S	S
732	1142354	urine	M	38	S	S	S	S	S	R	R	R	R	R	R	R	R	R	R
P7	1068624	urine /	F	65	R	S	S	S	S	I	R	S	R	R	R	R	R	R	R
P8	1152417	urine			S	S	S	I	S	S	S	S	S	S	S	S	S	S	S
P9	1152415	ETA	M	49	R	R	R	I	S	R	R	R	R	R	R	R	R	R	R
p11	1078630	urine	M	38	R	R	R	R	S	S	R	R	R	R	R	R	R	R	R
P13	1156867	urine				S	S	S	S			S	S	S	S	S	S	S	R

## Sheet: NG 
Age	Sex	Sample type		Code	Age	Gender	Sample type		No	Code	samples
37	M	ETA		1072131	79 Y	F	sputum		2	1051343	BAL
37	M	Sputum		1074251	28 Y	M	sputum		S36	1156840	BAL
76	M	Sputum		1030546	82Y	F	sputum		4	1047833	BAL
40	F	Sputum		1048255	32Y	M	sputum		45	794965	BAL
37	M	Sputum		1177256	72Y	M	sputum		210	1169552	BAL
37	F	Sputum		1176643	17Y	M	sputum		7	1145682	sputum
80	F	Sputum		1184751	69Y	F	sputum		249	869445	BAL
65	M	ETA		1093737	53Y	M	sputum		15	1144044	Blood
52	F	ETA		1162762	19Y	F	sputum		10	1200195	sputum
22	F	ETA		1161811	13Y	M	sputum		11	1199111	BAL
1	F	ETA		1157670	55Y	M	sputum		20	1199744	Blood
81	M	Sputum		1161649	42Y	M	blood		13	1199838	sputum
68	M	Sputum		1160543	51Y	M	blood		28	1054888	Blood
56	M	BAL		1169546	72Y	M	blood		34	1200823	Blood
49	M	ETA		1163755	57Y	M	urine		16	1199353	Catheter tip
45	M	ETA		1149631	53Y	M	urine		17	1075507	Sputum
80	F	Sputum		1017421	75Y	F	blood		18	1108869	Urine
76	M	Sputum		1037178	55Y	M	BAL		110	1161811	Blood
50	M	ETA		1063750	23Y	M	BAL		116	1190390	Blood
60	F	Sputum		1161408	69Y	F	ETA		S27	1117680	Blood
52	M	ETA		1017626	59y	M	Nasal		S30	1152415	Blood
73	M	Sputum		1186710	60Y	F	blood		23	1199726	urine
80	F	BAL		1139887	27Y	M	sputum		24	1092709	Urine
70	M	ETA		1143334	32Y	F	sputum		25	1067925	Sputum
80	M	BAL		1158108	32Y	F	sputum		39	1199285	Blood
				1157030	31Y	F	sputum		27	1199419	Urine
				1204269	54	F	Nasal		94	1197266	Blood
				1204342	39	F	ETA		29	1199353	CV LINE
				1204443	40	M	ETA		21	1205097	Blood
				1197266	52	M	URINE		31	1200968	urine
				1195433	54	F	urine		32	1200967	Sputum
				1190390	53	F	urine		150	1021953	Blood
				1198046	58	F	urine		89	1205397	Blood
				1055740	81	F	sputum		35	1200218	CV LINE
				1199351	68	M	sputum		36	1175784	Blood
				1199353	36	M	sputum		230	845579	Blood
				1200210	15	F	sputum		1	1200493	Sputum
				1200341	54	M	sputum
				1201006	50	M	sputum
				1202698	44	M	sputum
				1201006	57	M	ETA

## Sheet: GN
596	1114776	sputum			N	N		65M	R	R	R	R	R	R	S	S	S	S	S	S	S	S	S
701	1117396	sputum			P	P		65F	I	R	R	R	R	R	S	S	S	S	S	S	S	S	I
702	1000921	sputum			N	N		77F	S	R	R	R	R	R	S	S	I	S	S	S	S	S	S
734	1049523	sputum			P	P		58F	R	R	R	R	R	R	R	R	R	S	R	R	R	R	R
A26	1144054	sputum			P	P		51F	R	R	R	R	R	R	R	R	R	S	S	S	R	R	S
A27	1100929	urine			P	P		35F	S	R	R	R	R	R	R	R	R	S	S	S	S	R	R
A31	1145343	catheter			P	P		31F	S	R	R	R	R	S	S	S	S	S	S	S	S	S	R
43	1072513	BAL			N	N		80M	S	R	R	R	R	S	R	R	R	S	S	S	S	R	R
54	1014169	URINE			N	P		23F	S	R	R	R	R	R	R	R	R	S	S	S	S	S	S
60	1072131	Nasal			P	P		77F	I	R	R	R	R	R	R	R	R	S	S	S	R	S	S
81	1070771	ETA			P	P		62F	R	R	R	R	R	R	R	R	S	S	R	R	R	S	S
93	1028405	BLOOD			P	P		77F	R	R	R	R	R	S	R	R	S	S	R	S	R	S	R
145	1071408	BLOOD			N	P		78F	S	R	R	R	R	R	S	S	S	S	S	S	S	S	S
148	1060964	BAL			P	P		67M	R	R	R	R	R	R	R	R	R	I	R	R	R	R	R
175	1020031	sputum			N	P		67M	R	R	R	R	R	R	R	S	R	S	S	S	S	S	R
184	1016779	sputum			P	P		78M	R	R	R	R	R	R	S	S	S	S	S	S	S	S	S
523	1107318	sputum			N	N		69F	R	R	R	R	R	R	S	S	S	S	S	S	I	S	S
228	1084716	sputum			P	P		70F	R	R	R	R	R	R	S	S	S	S	S	S	S	S	S
K3	1147466	BAL			P	P		45F	R	R	R	R	R	R	R	R	R	S	R	R	R	R	R
K5	1067535	Sputum	266	1.44	N	N	P	34M	R	R	R	R	R	R	R	R	R	S	R	R	R	R	R
K7	1147963	catheter	186	1.47	N	N	P	9M	R	R	R	R	R	R	R	R	R	S	R	R	R	R	R
k8	1149088	nasal			N	N		29F	I	R	R	R	R	R	S	S	S	S	S	S	S	S	S
k9	1093939	nasal	110	1.53	N	N		70F	R	S	S	S	S	S	R	R	S	S	I	I	S	S	S
k12	1150025	urine	146	1.73	N	N			R	S	S	S	S	S	S	S	S	S	S	S	S	S	S
K13	1090480	urine	227	1.53	P	P		38F	R	S	R	S	S	R	S	R	R	S	S	S	S	S	S
M1	1074799	urine	90	1.81	N	N		2F	R	S	S	S	S	S	S	S	S	R	R	S	S	S	S
M2	1139312	sputum	2955	1.94	N	N		60F	R	S	S	S	S	S	S	R	R	R	S	S	S	R	R
k16	1082825	BAL	HIGH		P	P		27F	R	S	S	S	S	S	R	R	R	S	R	R	R	R	R
K17		BAL	720	1.71					R	S	S	S	S	S	S	S	S	S	S	S	S	S
K20	1088354	BAL	2140	1.45	P	P			R	S	R	R	R	I	S	S	S	S	S	S	S	S	S
K19	1107171	ETA	825	1.68	P	P			R	R	R	R	R	R	S	S	R	S	S	S	S	S	S

## Sheet: GP
No.	Age	sex	sample type	ID	VA	P.G	AMP	FOX	OXA	CN	STX	CIP	LEV	DAP	CL	MOX	ER	TIG	TE	LIN	RF	C
1	37	M	ETA	S.hemolyticus	S	S	R	R	R	R	R	R	S	S	S	S	R	S	R	S	S	S
2	37	M	Sputum	Entero. faecalis	S	S	S	S	S	S	S	S	S	S	S	S	I	S	S	S	S	S
3	76	M	Sputum	Entero. faecalis	S	S	S	S	S	S	S	R	R	S	S	S	R	S	R	S	RF	S
4	40	F	Sputum	Str. Intermedius	S	R	R	S	S	S	S	S	S	S	S	S	R	S	R	S	S	S
5	37	M	Sputum	Entero.faecalis	S	S	S	S	S	I	R	S	S	R	R	R	R	R	S	R	S	S
6	37	F	Sputum	Entero.faecalis	S	S	S	S	S	S	S	S	S	S	S	S	S	S	S	S	S	S
7	80	F	Sputum	Entero.faecalis	S	S	S	S	S	S	S	S	S	S	S	S	I	S	S	S	S	S
8	65	M	ETA	Str.acidominimus	S	R	R	S	R	S	S	S	S	S	S	S	S	S	S	S	S	S
9	52	F	ETA	S.aureus	S	R	S	R	R	S	S	S	S	S	R	S	R	S	S	S	S	S
10	22	F	ETA	S.aureus	S	R	R	S	S	S	R	R	R	S	R	R	R	S	R	R	S	S
11	1	F	ETA	S.aureus	S	R	R	S	S	S	S	R	R	S	R	S	R	S	R	S	S	S
12	81	M	Sputum	Entero.faecalis	S	S	S	S	S	I	S	I	S	S	S	S	I	S	S	S	S	S
13	68	M	Sputum	S.aureus	S	R	S	S	S	S	S	R	I	S	R	S	R	S	R	S	S	S
14	56	M	BAL	Entero.faecalis	R	R	R	S	S	S	S	S	S	S	S	S	S	S	S	S	RF	S
15	49	M	ETA	Entero.faecalis	S	S	S	S	S	S	S	S	S	S	S	S	S	S	S	S	S	S
16	45	M	ETA	S.aureus	S	R	R	R	R	R	R	R	R	R	R	S	R	S	R	S	R	R
17	80	F	Sputum	S.haemolyticus	S	R	R	R	R	S	R	I	I	R	S	R	R	R	S	S	R	R
18	76	M	Sputum	S.haemolyticus	S	R	R	R	R	S	S	S	S	S	R	S	R	S	R	S	S	R
19	50	M	ETA	S.haemolyticus	S	R	S	S	S	S	S	S	S	S	S	S	S	S	S	S	S	S
20	60	F	Sputum	Entero.faecalis	S	S	S	S	S	S	S	S	S	S	S	S	R	S	R	S	S	R
21	52	M	ETA	Strep.agalatia	S	R	R	S	S	S	S	S	I	S	S	S	R	S	S	S	S	S
22	73	M	Sputum	S.Sciuri	R	S	S	S	S	S	S	R	R	S	S	S	R	S	R	S	S	S
23	80	F	BAL	Morexilla cataralis	S	R	R	S	S	S	S	S	S	S	S	S	R	S	R	S	I	S
24	70	M	ETA	S.aureus	I	R	R	R	R	S	S	S	S	S	R	S	R	S	R	S	S	S
25	80	M	BAL	Entero.faecalis	R	S	S	R	R	R	R	S	S	S	R	S	R	S	R	S	R	R

## Sheet: fungus 
NO.	Code	spices	Sample	age	sex	fluconazol	miconazol	voriconazol	nystatin	amphotrisin	itraconazol	clotrimazol	caspofugen
1T	1205362	Candida albicance	ETA	56	F	S	R	S	S	S	R	R	R
2T	815669	Candida albicance	urine	55	M	R	R	R	R	R	R	R	R
3T	1205384	C. Tropicalis	ETA	67	F	S	R	R	R	R	R	R	R
4T	1091357	C. Tropicalis	BAL	79	F	S	S	S	S	S	S	S	S
5T	1206167	C. Tropicalis	BAL	11	M	S	R	S	S	S	R	R	R
6T	1056285	C.abicance	urine	62	M	R	R	R	S	S	R	R	S
7T	10898765	Aspergilus	nasal	78	M	R	R	R	R	S	S	S	S
8T	10898768	Aspergilus	sputum	78	M	R	R	S	R	R	R	R	R
9T	1098432	Aspergilus	sputum	45	M	R	R	S	S	R	R	R	R
TS1	119875	C.tropicalis	ETA	67	F	R	R	R	S	R	S	S	S
TS2	134589	C.albicance	ETA	46	F	R	R	S	R	R	S	S	S
TS3	1056285	C.albicance	urine	62	F	R	R	S	R	R	S	S	S
TS4	1206436	aspergelus	nasal	34	M	R	R	R	R	R	R	R	R
TS5	1206460	C.albicance	BAL	56	M	R	R	R	S	S	S	R	R
TS6	1039459	C.albicance	Blood	89	M	R	R	S	R	S	R	R	R
