# Supplementary material for: Detection of O25B-ST131 clone and blaCTX-M-15 gene in Escherichia coli isolated from patients with COVID-19
Source: PeerJ. 2025 Mar 6;13:e19011. doi: 10.7717/peerj.19011 (PMC11890292; doi:10.7717/peerj.19011)
Supplement: Supplemental Information 3 [file peerj-13-19011-s003.xlsx]

## Sheet: Sheet1
type of sample	sex	age	AK	CN	ER	IMP	MEM	CA	CFU	CAZ	CRO	CFE	C-T	AM	AMC	PIZ	CL	STX	NIT	CIP	LEV	TIG	DDST	CFX/ C1	CTX / C2	ESBL	ctxm gene	clon B 25 gene
Urine	M	67	S	S	S	S	S	R	R	R	R	R	S	R	S	S	S	S	S	S	S	S	P	P	P		p	p
ETA	F	81	S	R	S	S	S	R	R	I	R	R	S	R	S	S	S	R	S	R	R	S	P	P	P
Urine	F	65	S	S	S	S	S	R	R	S	R	I	S	R	S	S	S	R	S	R	R	S	N	P	N	E	p	p
Urine	F	76	S	S	S	S	S	R	R	S	R	I	S	R	S	S	S	R	S	R	R	S	N	P	N	E	p	p
sputum	F	36	S	S	R	R	R	R	R	R	R	R	R	R	R	R	S	S	I	R	R	S	N	P	N	C
Urine	F	31	S	S	R	R	R	R	R	R	R	R	R	R	R	R	S	S	I	R	R	I	N	P		C		p
Blood	M	32	S	R	S	S	S	R	R	I	R	R	S	R	I	I	S	R	S	R	R	S	N	P	N	E	p
Urine	M	67	S	S	R	R	R	R	R	R	R	R	R	R	R	R	S	R	S	R	R	S	N	P	N	C		p
Urine	F	19	S	S	S	S	S	R	R	I	R	R	S	R	S	S	S	R	S	R	R	S	N	P	P	E	p	p
Sputum	F	69	R	R	R	R	R	R	R	R	R	R	R	R	R	R	S	R	S	R	R	S	N	P	P	C
Urine	F	18	S	S	S	S	S	R	R	R	R	R	S	R	S	S	S	R	S	S	S	S	N	P	N	N		p
Blood	F	39	S	R	S	S	S	R	R	I	R	R	S	R	S	S	S	R	S	R	R	S	N	P	N	E	p
Urine	F	6	S	S	I	S	S	R	R	R	R	R	R	R	I	S	S	S	S	R	R	S	N	P	P	E		p
Urine	M	51	S	S	S	S	S	R	R	R	R	R	S	R	I	S	S	R	S	R	R	S	N	P	N	E	p	p
Blood	M	67	S	S	S	S	S	R	R	S	R	I	S	R	S	S	S	R	S	R	R	S	N	P	P	E	p
Urine	M	58	S	R	S	S	S	R	R	R	R	R	S	R	I	I	S	R	S	R	R	S	N	P	N	E	p	p
ETA	M	67	S	S	S	S	S	R	R	S	R	I	S	R	S	S	S	R	S	S	S	I	N	P	N	E	p
Blood	M	67	S	S	S	S	S	R	R	S	R	S	S	R	S	S	S	R	S	R	R		N	P	N	E	p
Urine	F	30	S	S	S	I	S	R	R	R	R	S	S	R	R	S	S	R	S	R	R	S	N	P	P	N		p
Urine	F	18	S	S				R	R	R	R	R		R	S	S	S	R	S	S	S	S	P	P	N	E		p
ETA	M	70	S	S	S	S	S	R	R	S	R	R	S	R	S	S	S	R	S	R	R	S	N	P	N	E
Catheter tip	M	85	S	S	R	R	R	R	R	R	R	R	R	R	R	R	S	R	S	R	R	I	P	P	P	C
sputum	F	5 M	S	S	S	S	S	R	R	S	R	I	S	R	S	S	S	R	S			S	N	N	N			p
sputum	F	79	S	S	R	R	S	R	R	R	R	R	R	R	R	R	S	R	R	R	R	I	P	P	N			p
sputum	F	65	S	S	R	S	S	R	R	R	R	I	R	R	S	S	S	R	S	R	R	I	P	P	N	E	p	p
sputum	F	55	S	R	R	R	R	R	R	R	R	R	R	R	R	R	S	R	R	R	R	S	N	P	N	C		p
sputum	F	93	S	R	S	S	S	R	R	R	R	R	R	R	R	R	S	S	S	R	R	S	P	P	N	E	p	p
sputum	F	60	S	R	I	S	S	R	R	R	R	R	R	R	I	S	S	S	R	R	R	S	P	P	N	E	p	p
sputum	M	93	S	S	S	S	S	R	R	S	R	R	S	R	S	S	S	R	S	R	R	S	N	N	N	E	p	p
sputum	M	74	I	S	S	S	S	R	R	R	R	R	S	R	R	R	S	R	S	R	R	S	P	P	P	E	p	p
sputum	F	97	S	S	S	S	S	R	R	R	R	R	S	R	S	S	S	S	S	R	R	I	P	P	P	E	p	p
ETA	F	81	S	R	S	S	S	R	R	R	R	R	S	R	S	S	S	R	S	R	R	I	P	P	P	E	p
Urine	F	72	R	R	S	S	S	R	R	R	R	R	S	R	S	S	S	S	S	R	R	S	P	P	P	E	p	p
Urine	F	64	S	S	S	S	S	R	R	R	R	R	S	R	S	S	S	R	S	R	R	S	P	P	P	E	p	p
Urine	F	68	S	S	S	S	S	R	R	R	R	R	R	R	S	S	S	S	S	R	R	I	P	P	P	E	p	p
Sputum	M	49	S	S	R	R	R	R	R	R	R	R	R	R	R	R	S	R	S	R	R	R	P	P	N	C
Throat swab	M	40	S	S	S	S	S	R	R	R	R	R	S	R	S	S	S	R	S	S	S	S	N	N	P	E	p
Urine	F	39	S	S	S	S	S	R	R	R	R	R	S	R	I	S	S	S	S	R	R	S	P	P		E	p	p
Catheter tip	F	75	S	S	S	S	S	R	R	S	R	S	S	R	S	S	S	R	S	S	S	S	N	N	N	N
urine	F	68	R	R	S	S	S	R	R	R	R	R	S	R	R	S	S	R	S	R	R	S	P	P	P	E	p	p
sputum	F	6 M	S	S	S	I	S	R	R	I	R	I	S	R	R	S	S	R	S	R	R	S	P	P	P	N
urine	F	58	S	S	S	S	S	S	S	S	S	S	S	S	S	S	S	S	S	S	S	S	N	N	N	N		p
urine	M	68	S	R	S	S	S	R	R	R	R	R	S	R	S	S	S	R	S	R	R	I	P	P	P	E	p	p
sputum	F	6	S	S	S	S	S	R	R	R	R	R	S	R	S	S	S	R	S	S	S	S	P	P	N	E	p	p
sputum	F	72	S	R	S	S	S	R	R	R	R	R	S	R	R	R	S	R	S	R	R	S	N	N	N			p
sputum	M	73	S	S	S	S	S	R	R	R	R	R	S	R	S	S	S	S	S	R	R	S	N	N	N	E		p
urine	M	30	S	S	S	S	S	R	R	R	R	R	S	R	S	S	S	S	S	S	S	S	P	N	P	E		p
urine	F	84	S	S	S	S	S	R	R	R	R	R	S	R	I	I	S	R	S	R	R	I	N	N	N			p
urine	F	76	S	S	S	S	S	R	R	R	R	R	S	R	S	S	S	S	S	R	R	S	N	N	N	E	p	p
blood	M	57	S	S	S	S	S	S	S	S	S	S	S	S	S	S	S	S	S	S	S	I	N	N	N		p
urine	F	62	S	S	S	S	S	S	S	S	S	S	S	S	S	S	S	S	S	S	S	I	N	N	N		p	p
urine	M	86	S	R	S	S	S	R	R	R	R	R	S	R	I	S	S	R	S	R	R	S	P	P	P	E	p	p
blood	M	55	S	S	S	S	S	R	R	R	R	R	S	R	I	S	S	R	S	R	R	S	P	P	P	E	p
urine	F	35	S	S	S	S	S	R	R	R	R	R	S	R	S	S	S	S	S	S	S	I	N	P	N			p
urine	F	58	S	R	S	S	S	R	R	R	R	R	R	R	I	S	S	R	R	R	R	S	N	P	N	E	p
Urine	F	3	S	S	R	R	R	R	R	R	R	R	R	R	R	S	S	R	R	R	R	S	N	N	N	C
Urine	F	70	S	S	S	S	S	R	R	R	R	R	S	R	R	S	S	R	S	S	S	S	N	N	N	E	p	p
Urine	F	75	S	S	S	I	S	R	R	S	S	S	R	R	S	S	S	S	S	R	R	S	N	N	N			p
sputum	M	26	S	S	S	S	S	S	S	S	S	S	S	S	S	S	S	S	S	S	S	S	N	N	N
sputum	M	65	S	R	S	S	S	R	R	R	R	R	S	R	R	I	S	R	R	R	R	S	P	P	N	E	p	p
sputum	F	55	S	S	S	S	S	S	S	S	S	S	S	R	S	S	S	S	S	S	S	S	N	N	N		p	p
sputum	M	69	S	S	S	S	S	S	R	S	S	S	S	S	S	S	S	S	S	R	R	S	N	N	N
sputum	M	55	S	S	S	S	S	R	R	R	S	S	S	R	R	S	S	S	S	S	S	S	N	N	N			p
sputum	F	93	S	S	S	S	S	R	R	I	S	R	S	R	S	R	S	R	S	S	S	I	N	N	P			p
ETA	F	84	S	S	S	S	S	R	R	R	R	R	S	R	I	I	S	R	S	R	R	S	P	P	P	E	p	p
ETA	M	73	S	R	S	S	S	R	R	R	R	R	S	R	I	S	S	S	R	R	R	S	P	P	P	E	p	p
ETA	M	98	S	S	S	S	S	R	R	R	R	R	S	R	I	S	S	S	R	R	R	S	P	P	P	E	p	p
ETA	F	76	S	S	S	S	S	R	R	R	R	R	S	R	R	S	S	R	S	R	R	S	N	P	P			p
ETA	F	22	S	S	S	S	S	R	R	R	R	R	S	R	S	S	S	S	S	S	S	S	P	P	P	E	p	p
ETA	F	42	S	S	S	S	S	S	S	S	S	S	S	R	S	S	S	R	S	S	S	I	N	N	N			p
ETA	M	23	S	S	S	S	S	R	R	R	R	R	S	R	I	S	S	R	S	R	R	S	P	P	P	E	p	p
ETA	M	42	S	S	R	S	S	R	R	R	R	R	R	R	I	S	S	S	S	R	R	S	P	P	P	E	p
Urine	M	83	S	R	S	S	S	R	R	R	R	R	S	R	S	S	S	R	S	R	R	S	P	P	P	E	p
Urine	F	27	S	R	S	R	S	R	R	R	R	I	S	R	R	I	R	R	I	R	R	I	N	P	P			p
Urine	F	28	S	S	S	S	S	R	R	R	R	R	S	R	S	S	S	S	S	S	S	S	N	P	P	E	p	p
blood	F	83	S	S	S	S	S	R	R	R	R	R	I	S	S	S	S	R	S	R	R	S	N	P	P	E	p
PL.F	M	71	S	R	S	S	S	R	R	R	R	R	S	R	I	S	S	R	S	R	R	I	N	P	P	E	p
Urine	F	80	S	S	S	S	S	R	R	R	R	R	S	R	I	S	S	R	S	R	R	S	N	P	P	E	p	p
P.F	M	28	S	S	S	S	S	R	R	I	R	S	R	R	R	I	S	S	S	S	S	S	P	P	P		p
Urine	F	86	S	S	I	S	S	R	R	R	R	R	R	R	R	S	S	S	S	S	S	S		P		E	p	p
Urine	F	40	S	S	S	S	S	S	S	S	S	S	S	S	S	S	S	S	S	S	S	S	N	N	N			p
Sputum	F	69	S	S	R	R	S	R	R	R	S	R	R	R	R	R	S	S	S	R	R	S	N	N	N			p
Sputum	F	4 M	S	S	S	S	S	S	S	S	S	S	S	S	S	S	S	R	S	S	S	S	N	N	N			p
Sputum	F	62	S	S	S	S	S	S	S	S	S	S	S	S	S	S	S	S	S	S	S	S	N	N	N			p
Sputum	M	84	S	S	R	S	S	R	R	I	S	S	S	R	R	S	S	R	S	R	R	S	N	N	N			p
Sputum	F	71	S	R	S	S	S	R	R	R	R	R	S	R	R	S	S	R	S	R	R	S	N	N	N	E	p	p
Sputum	M	55	S	S	S	S	S	S	S	S	S	S	S	S	S	S	S	S	S	S	S	S	N	N	N			p
Sputum	F	11	S	S	S	S	S	R	R	I	R	I	S	R	R	S	S	R	S	S	S	S	P	P	N			p
Urine	F	32	S	S	R	S	S	R	R	S	R	S	I	I	S	S	S	S	R	S	S	I	P	P	N			p
Urine	F	77	S	R	I	S	S	R	R	R	R	R	R	R	R	R	S	S	S	R	R	S	N	P	N	E	p	p
Urine	F	36	S	S	S	S	S	R	R	R	R	R	S	R	I	S	S	S	S	R	R	S	N	P	P	E	p
Urine	F	7	S	S	S	S	S	R	R	R	R	R	S	R	R	S	S	R	S	S	S	S	N	P	P	E	p	p
BLOOD	M	85	S	S	S	S	S	R	R	R	R	R	S	R	I	S	S	R	S	S	S	S	P	P	P	E	p	p
Urine	M	68	S	S	R	R	R	R	R	R	R	R	R	R	R	R	S	R	R	R	R	S	N	P	N	E	p
ETA	M	69	S	S	R	R	R	R	R	R	R	R	R	R	R	R	S	R	S	R	R	I	N	N	N	C	p
Blood	F	83	S	S	S	S	S	S	S	S	S	S	S	I	S	S	S	S	S	S	S	S	N	N	N
urine	F	51	S	S	S	S	S	S	S	S	S	S	S	S	S	S	S	S	S	S	S	S	N	N	N			p
Urine	M	48	S	R	S	S	S	R	R	R	R	R	R	R	S	S	S	R	S	R	R	S	P	P	P	E	p	p
Urine	M	73	S	R	S	S	S	R	R	R	R	R	S	R	I	I	S	S	R	R	R	S		N	N	E	p	p
Urine	F	15	S	S	S	S	S	R	R	R	R	R	S	R	S	S	S	R	S	R	R	S	N	P	N	E	p
Urine	M	39	S	S	S	S	S	S	S	S	S	S	S	S	S	S	S	R	S	S	S	I	N	N	N			p
urine	F	8	S	S	R	I	S	R	R	R	R	R	R	R	R	S	S	S	S	R	R	S	P	P	P	E	p
urine	F	75	S	S	S	S	S	R	R	R	R	R	S	R	R	R	S	S	S	R	R	S	N	P	N	E	p	p
urine	F	58	S	S	S	S	S	R	R	R	R	R	S	S	S	S	S	S	S	R	R	S	P	P	N	E	p	p
urine	F	18	S	S	S	S	S	R	R	R	R	R	S	S	S	S	S	R	S	R	R	S	P	P	N	E	p	p
Blood	M	61	S	S	S	S	S	S	S	S	S	S	S	R	S	S	S	R	S	R	R	S	N	N	N	E	p
Urine	23M	23	S	S	S	S	S	S	S	S	S	S	S	S	S	S	S	S	S	S	S	S	S	S	S			p
Urine	77F	77	S	S	S	S	S	S	S	S	S	S	S	S	S	S	S	S		S	S		N	P	N			p
Urine	60M	60	S	S	S	S	S	R	R	R	R	R	R	R	R	R	I	R		R	R		N	P	N	E	p	p
Urine	44F	44	S	S	S	S	S	R	R	R	R	S	R	R	R	R	I	R		R	R		P	P	P	E	p	p
Urine	21F	21	S	S	S	R	S	R	R	R	R	R	S	R	R	I	I	R	R	R	R		P	P	P	E	p	p
Urine	68M	68	S	S	S	S	S	R	R	R	R	S	S	R	S	S	S	S	S	R		S	P	P	P	E	p	p
ETA	33 F	33	S	S	S	S	S	R	R	R	I	S	S	R	S	S	S	R	S	S	S	S	p	P	p	E	p	p
ETA	60F	60	S	I	S	S	S	R	R	R	R	R	S	R	R	S	S	S	S	R	R	S	N	P	N	E	p	p
ETA	68F	68	S	R	S	S	S	R	R	R	R	R	S	R	S	S	S	S	S	S	S	S	P	P	P	E	p	p
ETA	1F	1	S	I	S	S	S	R	R	R	R	R	S	R	S	S	S	S	S	S	S	S	P	P	P	E	p	p
ETA	40F	40	S	S	S	S	S	R	R	R	R	R	S	R	S	S	S	S	S	S	S	S	P	P	P	E	p	p
ETA	49F	49	S	S	S	S	S	S	S	S	S	S	S	R	S	S	S	S	S	S	S	S	P	N	N			p
ETA	55M	55	S	R	S	S	S	R	R	R	R	R	S	R	R	S	S	R	S	R	R	S	N	P	N	E	p	p
ETA	74M	74	S	S	S	S	I	R	R	R	R	R	S	R	R	I	S	R	S	R	R	S	P	P	P	E	p	p
ETA	48M	48	S	S	S	S	S	S	S	S	S	S	S	R	S	S	S	I	I	S	S	S	p	N	p			p
ETA	42M	42	S	S	S	S	S	R	R	R	R	R	S	R	S	S	R	R	S	R	R	S	N	P	N	E	p	p
ETA	26F	26	R	R	R	R	R	R	R	R	R	R	R	R	R	R	S	R	S	R	R	S	P	P	P	E	p	p
ETA	24F	24	S	S	S	S	I	R	R	R	R	R	S	R	R	S	S	R	S	S	S	S	P	P	P	E	p	p
Urine	58F	58	S	S	R	R	I	R	R	R	R	R	S	R	R	S	S	S	S	R	R	S	P	P	P	E	p	p
Urine	47M		S	R	S	S	S	R	R	S	R	R	S	R	I	S	S	R	S	R	S	S	N	P	P	E	p	p
BAL	1M		R	R	R	R	R	R	R	R	R	R	S	R	R	R	S	R	S	R	R	S	P	P	P	E	p	p
BAL	83M		R	R	R	R	R	R	R	R	R	R	R	R	R	R	S	R	R	R	R	S	N	P	N	E	p	p
BAL	44F		S	S	R	R	I	R	R	R	R	S	S	R	R	I	S	R	R	S	R	S	P	P	P	E	p	p
BAL	78M		S	R	S	S	S	R	R	R	R	R	R	R	R	I	S	R	R	S	S	S	N	P	N	E	p	p
Urine	75F		S	S	S	S	S	R	R	R	R	R	R	R	R	S	S	S	S	S	S	S	P	P	N	E	p	p
Urine	23F		S	R	S	S	S	R	R	R	R	R	S	R	R	S	S	R	S	R	R	S	p	P	P	E	p	p
Sputum	83 F		S	S	S	S	S	R	R	R	R	S	S	R	R	S	S	S	S	S	S	S	p	P	N	E	p	p
Sputum	54F		S	R	S	S	S	R	R	R	R	R	S	R	I	S	S	S	S	S	S	S	p	P	P	E	p	p
Sputum	19F		R	R	R	R	R	R	R	R	R	R	S	R	R	R	S	R	S		R	I	P	P	P	E	p	p
Sputum	50M		S	R	S	S	S	S	S	S	S	I	S	S	I	S	S	R	S	S	S	S	p	P	N		p	p
Sputum	51F		S	S	S	S	S	S	S	S	R	I	S	S	R	I	S	S	S	R	R	I	N		N		p	p
Sputum	48F		S	S	S	S	S	S	S	R	S	I	S	S	R	S	S	R	S	S	S	S	N	N	p			p
Urine	7F		S	S	S	S	S	R	R	R	R	R	S	R	R	S	S	S	R	S	S	S	p	N	p	E	p	p
Urine	1F		S	S	S	S	S	S	S	S	S	S	S	R	S	S	S	S	S	S	S	S	p	N	p			p
Urine	84M		S	S	S	S	S	R	R	R	R	R	S	R	S	S	S	S	S	R	R	S	N	N	N	E	p	p
BAL	70F		S	S	S	S	S	R	R	R	R	R	S	R	R	S	S	S	S	R	R	S	P	P	N	E	p	p
BAL	43M		R	R	S	S	S	R	R	R	R	R	S	R	R	S	S	S	S	R	R	S	P	P	P	E	p	p
BAL	38M		S	R	S	S	S	R	R	R	R	R	S	R	R	I	S	R	R	R	R	S	p	P	p	E	p	p
BAL	63M		S	S	S	S	S	R	R	R	R	R	S	R	R	S	S	R	R	R	R	S	P	P	P	E	p	p
BAL	81F		S	S	S	S	S	R	R	R	R	R	S	R	R	S	S	S	R	R	R	S	p	P	P	E	p	p
BAL	91F		S	S	S	S	S	R	R	R	R	R	S	R	I	R	S	R	R	R	R	S	p	P	N	E	p	p
BAL	81 F		S	S	S	S	S	R	R	R	R	R	S	R	R	S	S	S	R	S	S	S	p	P	N	E	p	p
Urine	35F		S	S	S	S	S	R	R	R	R	R	S	R	S	S	S	S	R	S	S	S	p	P	P	E	p	p
Urine	23F		S	S	S	S	S	R	R	R	R	R	S	R	R	S	S	S	S	S	S	S	p	P	P	E	p	p
Urine	28F		S	S	S	S	S	R	R	R	R	R	S	R	S	S	S	S	S	R	R	S	p	P	N	E	p	p
Urine	76F		S	S	S	S	S	R	R	R	R	R	S	R	S	S	S	S	S	I	S	S	P	P	P	E	p	p
Urine	40F		S	S	S	S	S	R	R	R	R	R	S	R	R	S	S	S	S	R	R	S	P	P	P	E	p	p
Urine	77F		S	S	S	S	S	R	R	R	R	R	S	R	R	R	S	R	S	R	R	S	N	P	P	E	p	p
Urine	66M		R	S	S	S	S	R	R	R	R	R	S	S	I	S	S	R	S	R	R	S	N	P	P	E	p	p
Urine	50M		S	S	S	S	S	R	R	R	R	R	S	R	R	S	S	S	S	S	S	S	P	P	P	E	p	p
Urine	12F		S	S	S	S	S	R	R	R	R	R	S	R	R	S	S	S	S	S	S	S	P	P	P	E	p	p
Urine	66F		S	S	S	S	S	R	R	R	R	R	S	R	R	S	S	R	S	R	I	S	P	P	P	E	p	p
Urine	88F		S	S	S	S	S	S	S	S	S	S	S	R	R	S	S	S	S	S	R	S	p	N	p			p
Urine	51M		S	S	S	S	S	S	S	S	S	S	S	R	S	S	S	S	S	S	S	S	N	N	N			p
Urine	75F		S	S	S	S	S	S	S	S	R	S	S	R	R	I	S	S	S	S	S	S	N		N		p	p
Urine	77M		S	S	S	S	S	R	R	R	R	R	S	R	I	S	S	R	S	R	R	S	N	N	N	E	p	p
Urine	48F		R	S	S	S	S	R	R	R	R	R	S	R	R	R	S	S	S	R	R	S	P	N	P	E	p	p
Urine	66F		R	S	S	S	S	R	R	R	R	R	S	R	R	R	S	R	R	R	R	S	N	P	P	E	p	p
Urine	33F		R	R	S	I	S	R	S	S	R	R	S	R	R	R	S	R	R	R	R	S	P	N	N			p
Urine	55F		S	S	S	S	S	R	R	R	R	S	S	R	S	S	S	R	S	S	S	S	P	N	P	E	p	p
Urine	4F		S	S	S	S	S	S	S	S	S	S	S	R	S	S	S	R	S	S	S	S	P	N	P			p
Urine	71F		S	S	S	S	S	R	R	R	R	R	S	R	R	S	S	S	S	S	S	S	N	N	N	E	p	p
Urine	83M		I	S	S	S	S	R	R	R	R	R	S	R	R	S	S	R	S	R	R	S	P	N	P	E	p	p
Urine	48M		S	S	S	S	S	S	S	S	S	S	S	R	R	S	S	S	S	S	S	S	P	N	P			p
Urine	92F		S	S	S	S	S	S	S	S	S	S	S	S	S	S	S	R	S	R	R	S	N	N	N			p
Urine	1M		S	S	S	S	S	R	R	R	R	R	S	S	I	S	S	S	S	S	I	S	N	N	N	E	p	p
Urine	57F		S	S	S	S	S	R	R	R	R	R	S	S	R	S	S	R	S	R	R	S	P	P	P	E	p	p
Urine	66F		R	R	I	R	R	R	R	R	R	R	R	R	R	R	S	R	R	R	R	R	P	P	P	C	p	p
Urine	66F		R	R	S	S	S	R	R	R	R	R	S	R	I	S	S	R	S	R	R	S	p	P	p	E	p	p
Urine	67F		S	S	S	S	S	R	R	R	R	R	S	R	S	S	S	R	S	R	R	S	p	P	p	E	p	p
Urine	78M		S	S	S	S	S	R	R	R	R	R	S	R	S	S	S	S	R	S	S	S	p	P	p	E	p	p
Urine	49M S		S	S	S	S	S	R	R	R	R	R	S	R	R	R	S	R	R	R	R	S	p	P	p	E	p	p
Urine	76M		S		S	S	S	S	S	S	S	S	S	S	S	S	S	S	S	S	S	S	N	N	N		p	p
Urine	60F		S	S	S	S	S	R	R	R	R	R	S	R	R	I	S	R	R	R	R	S	N	N	N	E	p	p
Urine	69M		S	S	S	S	S	R	R	R	R	R	S	R	R	R	S	R	R	R	R	S	P	P	N	E	p	p
Urine	80M		S	S	S	S	S	R	R	R	R	R	S	R	R	S	S	S	S	R	R	S	P	P	N	E	p	p
Urine	77M		R	S	S	S	S	R	R	R	R	R	S	R	R	S	S	R	S	R	R	S	P	P	P	E	p	p
Sputum	57M		R	R	S	S	S	R	R	R	R	R	S	R	R	S	S	R	S	R	R	S	P	P	P			p
Sputum	33F		I	R	S	S	S	S	S	I	R	R	S	R	R	S	S	R	S	R	I	S	P	P	P			p
Sputum	64F		R	R	S	S	S	R	R	R	R	R	S	R	R	S	S	R	S	R	R	S	P	P	P	E	p	p
Sputum	5F		S	S	S	S	S	R	R	S	R	I	S	S	I	S	S	S	S	S	S	S	P	P	P			p
Sputum	55F		R	R	S	S	S	R	R	R	R	R	S	R	R	S	S	S	S	R	R	S	P	P	P			p
Sputum	79M		S	S	S	S	S	R	R	R	R	R	S	R	R	S	S	R	S	R	R	S	P	P	P	E	p	p
Sputum	78M		S	S	S	S	S	S	S	S	S	S	S	R	S	S	S	S	S	S	S	S	p	N	N			p
Sputum	74M		S	S	S	S	S	S	S	S	S	I	S	R	R	S	S	S	S	S	R	S	N	N	N			p
Urine	37M		R	R	R	R	R	R	R	R	R	R	R	R	R	R	S	R	S	R	R	R	N	N	N	C	p	p
Urine	62F		R	R	R	R	R	R	R	R	R	R	S	R	R	R	S	R	R	R	R	R	P	N	N	C	p	p
Urine	67M		S	S	S	S	S	S	S	S	S	I	S	R	I	S	S	R	R	R	R	S	P	N	N			p
Urine	60F		S	S	S	S	S	R	R	R	R	R	S	R	R	S	S	R	R	R	R	S	N	P	N	E	p	p
Urine	57F		S	S	S	S	S	R	R	R	R	R	S	R	R	S	S	S	S	S	S	S	P	P	P			p
Urine	5F		S	S	S	S	S	I	S	S	I	S	S	R	R	S	S	R	S	S	S	S	N	N	N			p
ETA	66F		S	S	S	S	S	R	R	R	R	R	S	S	S	S	S	S	S	R	S	S	N	N	N			p
ETA	60F		S	S	S	S	S	S	S	S	S	S	S	R	R	I	S	S	S	S	R	S	P	P	P		p	p
ETA	23M		R	R	S	S	S	R	R	R	R	R	S	R	R	I	S	R	S	R	R	S	N	N	N	E	p	p
ETA	70F		R	R	S	S	S	R	R	R	R	R	S	R	I	S	S	R	S	R	R	S	P	P	P	E	p	p
ETA	83M		S	S	S	S	S	R	R	R	R	R	S	R	R	R	S	R	S	R	R	S	P	P	P	E	p
ETA	60M		S	S	S	S	S	R	R	R	R	R	S	R	I	S	S	S	S	R	R	S	P	P	P	E	p
Urine	79F		S	S	S	S	S	R	R	R	R	R	S	R	R	S	S	S	S	S	S	S	P	P	P	E	p
Urine	32F		S	R	S	S	S	S	S	S	S	S	S	S	S	S	S	S	S	R	R	S	P	P	P
Urine	81M		S	S	S	S	S	R	R	R	R	R	S	S	S	S	S	S	S	S	S	S	N	N	N	E	p
Urine	M	66	S	R	S	S	S	R	R	R	R	R	S	R	S	S	S	R	S	R	R	S	N	P	P	E	p
Urine	M	66	S	R	S	S	S	R	R	R	R	R	S	R	S	S	S	R	S	R	R	S	P	P	P	E	p	p
Peritonial	F	72	S	S	R	R	S	R	R	S	R	I	S	R	R	I	S	R	S	R	R	S	P	P	N	C	p
Urine	F	16	S	R	S	S	S	R	R	R	R	R	S	R	I	I	S	S	S	S	S	S	P	P	N	E	p
Urine	F	24	S	S	S	S	S	R	R	R	R	R	S	R	S	S	S	S	S	S	S	S	P	P	P	E	p
Urine	F	21	S	S	S	S	S	R	R	R	R	R	S	R	S	S	S	R	S	R	R	S	P	P	N	E	p
Peritonial	M	61	S	S	I	S	S	R	R	R	R	R	R	R	R	I	S	R	S	R	R	S	P	P	N
Urine	F	77	S	S	S	S	S	R	R	I	R	I	S	R	S	S	S	R	S	I	S	S	N	N	N	N
Urine	M	14	S	S	S	S	S	R	R	R	R	R	S	R	S	S	S	S	S	I	S	S	N	N	N	E	p
P.F	F	60	S	S	S	S	S	R	R	R	R	R	S	R	S	S	S	S	S	R	R	S	N	P	P	E	p
Urine	F	39	S	S	S	S	S	R	R	R	R	R	S	R	S	S	S	S	S	R	R	S	N	P	P	E	p
P.F	M	35	S	S	R	S	S	R	R	R	R	R	R	R	R	R	S	R	S	R	R	S	N	P	P	E	p
Urine	F	9	S	S	S	S	S	R	R	R	R	R	S	R	S	S	S	R	S	I	S	S	N	P	N	E	p	p
ETA	M	76	S	S	R	R	R	R	R	R	R	R	R	R	R	S	S	S	R	R	R	I	N	P	N	E	p
Urine	F	47	S	S	S	S	S	S	S	S	S	S	S	S	S	S	S	S	S	S	S	S	N	N	N
Blood	F	76	S	S	S	S	S	R	R	R	R	R	S	R	I	S	S	R	S	R	R	S	N	P	P	E	p
Urine	F	76	S	S	S	S	S	R	R	R	R	R	S	R	I	S	S	R	S	R	R	S	N	P	N	E	p
Urine	F	2	S	S	S	S	S	S	S	S	S	S	S	S	S	S	S	S	S	S	S	S	N	N	N
Urine	F	26	S	S	S	S	S	S	I	S	S	S	S	R	S	S	S	R	S	R	R	S	N	N	P
Urine	F	54	S	S	I	R	R	R	R	S	S	S	S	R	R	S	S	R	S	R	R	S	N	N	P
Urine	F	38	S	S	S	S	S	S	S	S	S	S	S	S	S	S	S	S	S	S	S	S	N	N	P			p
Urine	F	2	S	S	S	S	S	R	R	R	R	R	S	R	S	S	S	S	S	S	S	S	P	N	P			p
Urine	F	25	S	S	S	S	S	R	R	R	R	R	S	R	S	S	S	S	S	S	S	S	N	N	N	E	p
Urine	F	69	S	S	S	S	S	R	R	R	R	R	S	R	S	S	S	R	S	R	R	S	N	N	P	E	p	p
Sputum	F	51	S	R	S	S	S	R	R	R	R	R	S	R	S	S	S	R	S	R	R	S	N	N	N	E	p
Urine	F	24	S	S	S	S	S	S	S	S	S	S	S	S	S	S	S	S	S	S	S	S	N	N	N		p	p
Urine	F	48	S	S	S	S	S	S	S	S	S	S	S	S	S	S	S	R	S	S	S	S	N	N	P		p	p
Catheter tip	M	57	S	S	S	S	S	R	R	R	R	R	R	R	R	R	S	R	S	R	R		N	P	P	E	p
